# Supplementary material for: Evaluation of Social Isolation, Loneliness, and Cardiovascular Disease Among Older Women in the US
Source: PubMed Central journal article supplement (PMC8811637; doi:10.1001/jamanetworkopen.2021.46461), 2022-02-02

## Supplementary Online Content

Golaszewski NM, LaCroix AZ, Godino JG, et al. Evaluation of social isolation, loneliness, and cardiovascular disease among older women in the US. *JAMA Netw Open*. 2022;5(2):e2146461. doi:10.1001/jamanetworkopen.2021.46461

**eTable.** Hazard Ratios for the Associations of Social Isolation and Loneliness Accounting for Competing Risk of Nonmajor CVD Death (N = 57 825)

**eAppendix.** Cubic Spline Analyses With 3, 4, and 5 Knots to Model Social Isolation (Panel A) and Loneliness (Panel B) in Relation to Risk for CVD Among Older Women (N = 57 825)

This supplementary material has been provided by the authors to give readers additional information about their work.

**eTable 1.** Hazard Ratios for the Associations of Social Isolation and Loneliness accounting for Competing Risk of Non-major CVD death (n=57,825)

|                                                                                                                                                                 | <b>Social Isolation<sup>e</sup></b> |                  | <b>Loneliness<sup>f</sup></b> |                  |
|-----------------------------------------------------------------------------------------------------------------------------------------------------------------|-------------------------------------|------------------|-------------------------------|------------------|
|                                                                                                                                                                 | HR (95% CI)                         |                  | HR (95% CI)                   |                  |
|                                                                                                                                                                 | Main Analysis                       | Competing Risk   | Main Analysis                 | Competing Risk   |
| Model 1 <sup>a</sup>                                                                                                                                            | 1.18 (1.13 - 1.23)                  | 1.17 (1.12-1.21) | 1.14 (1.10 - 1.18)            | 1.12 (1.08-1.16) |
| Model 2 <sup>b</sup>                                                                                                                                            | 1.16 (1.11 - 1.20)                  | 1.14 (1.1-1.19)  | 1.11 (1.07 - 1.15)            | 1.10 (1.06-1.14) |
| Model 3 <sup>c</sup>                                                                                                                                            | 1.13 (1.09 - 1.18)                  | 1.12 (1.07-1.17) | 1.10 (1.06 - 1.14)            | 1.08 (1.05-1.12) |
| Model 4 <sup>d</sup>                                                                                                                                            | 1.08 (1.03 - 1.12)                  | 1.07 (1.02-1.11) | 1.05 (1.01 - 1.09)            | 1.04 (1.00-1.08) |
| a Model 1 was adjusted for age, race/ethnicity, education, and depression.                                                                                      |                                     |                  |                               |                  |
| b Model 2 was adjusted for Model 1 plus either loneliness or social isolation depending on the exposure.                                                        |                                     |                  |                               |                  |
| c Model 3 was adjusted for Model 2 plus smoking status, frequency of alcohol consumption, history of depression, physical activity, and diet.                   |                                     |                  |                               |                  |
| d Model 4 was adjusted for Model 3 plus history of diabetes, hypertension medication use, hyperlipidemia medication use, overall health, and physical function. |                                     |                  |                               |                  |
| e Median for social isolation is 1.                                                                                                                             |                                     |                  |                               |                  |
| f Median for loneliness is 0.33.                                                                                                                                |                                     |                  |                               |                  |
| * CVD: cardiovascular disease; HR: hazard ratio; CI: confidence interval                                                                                        |                                     |                  |                               |                  |
| ** Main analysis appears in Table 2 of the manuscript.                                                                                                          |                                     |                  |                               |                  |

**eAppendix.** Cubic spline analyses with 3, 4, and 5 knots to model social isolation (Panel A) and loneliness (Panel B) in relation to risk for CVD among older women (n=57,825)

**Panel A**

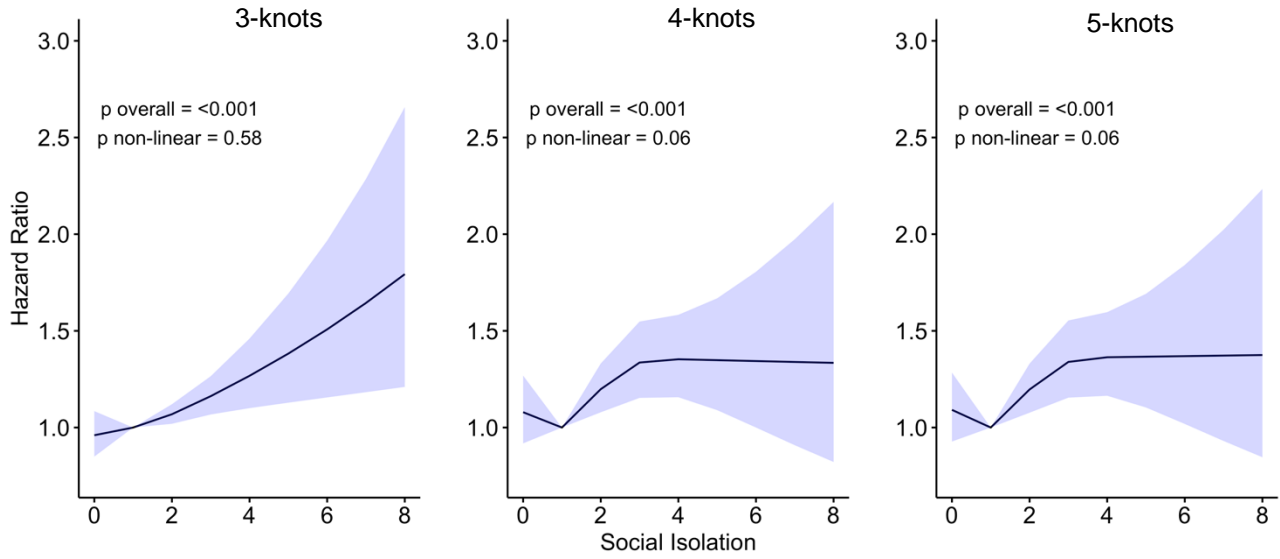

**Panel B**

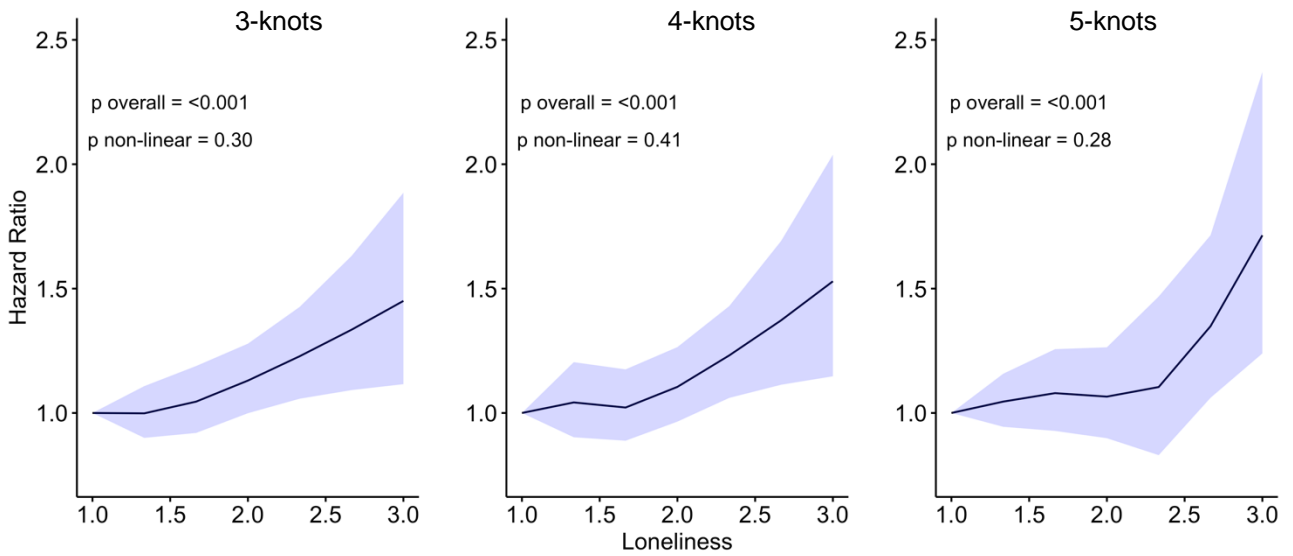

Supplement: jamanetwopen-e2146461-s001.pdf [file jamanetwopen-e2146461-s001.pdf]
